# Supplementary material
Source: PubMed Central journal article supplement (PMC5710847)

A.

### Cellular changes with macrophage depletion

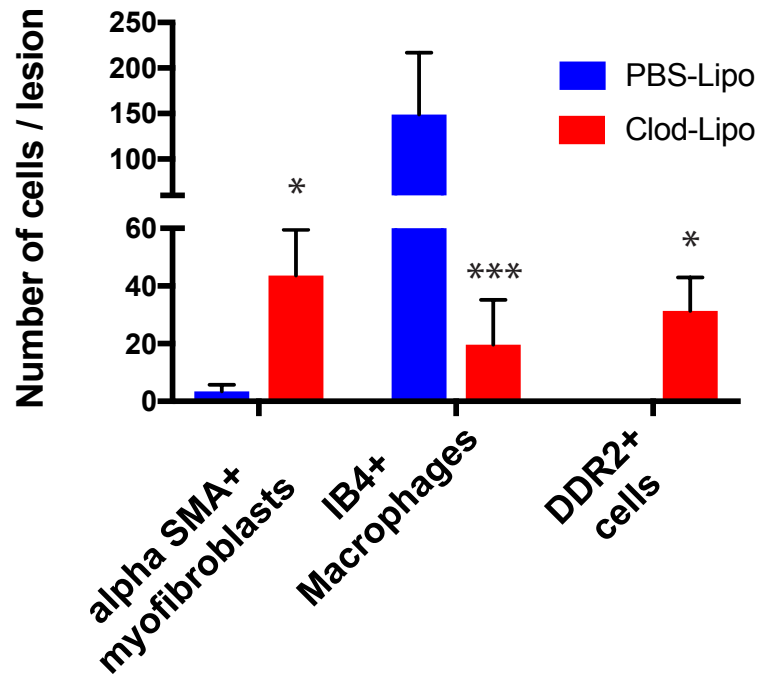

B.

### Changes in expression with macrophage depletion

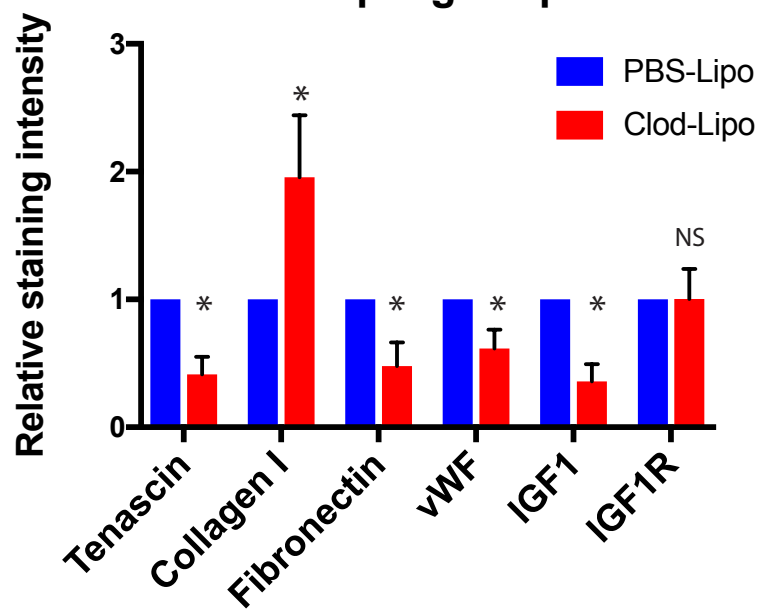

Supplement: NIHMS902505-supplement-Supp_1_.pdf [file NIHMS902505-supplement-Supp_1_.pdf]
