# Supplementary material
Source: PubMed Central journal article supplement (PMC5710847)

PBS-Lipo

Clo-Lipo

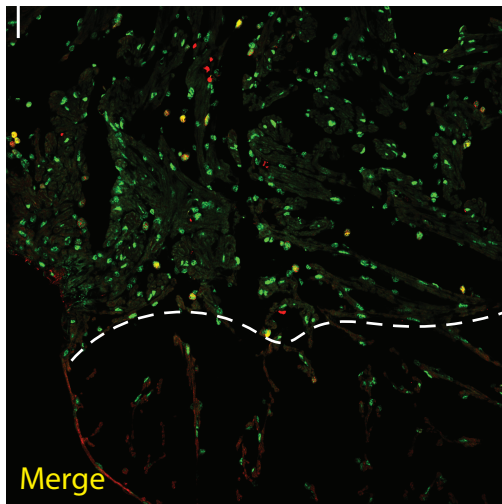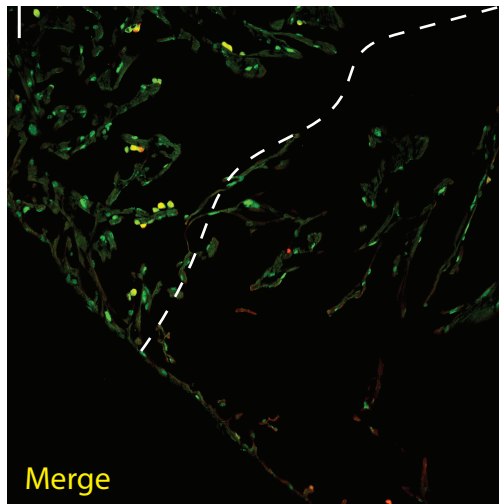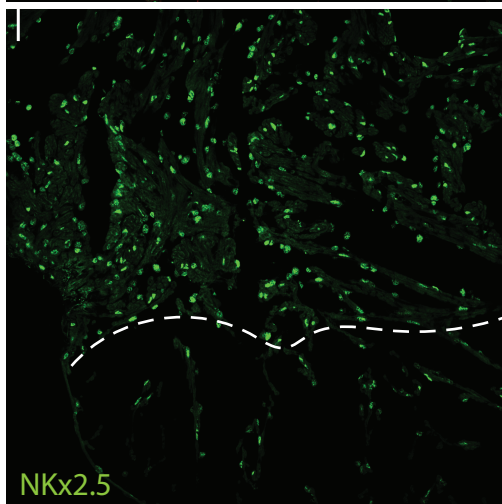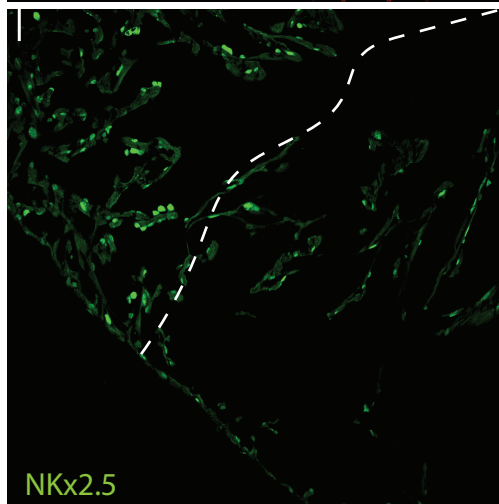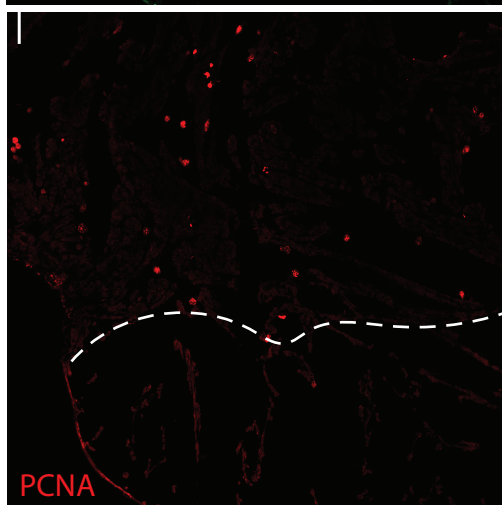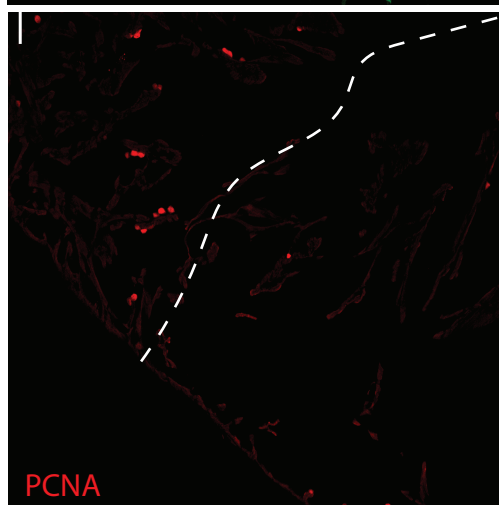

Supplement: NIHMS902505-supplement-Supp_2_.pdf [file NIHMS902505-supplement-Supp_2_.pdf]
